# Supplementary material
Source: MDPI journal article supplement (https://www.mdpi.com/2297-8739/9/3/67)
Supplement: s1 [file s1]

## Supplementary material

**Table S1.** Chemicals used in the study

| Chemicals/reagents                 | Company                    |
|------------------------------------|----------------------------|
| Deionised water                    | Weinert wassertechnik GMBH |
| HCl                                | Merck p.a.                 |
| HNO <sub>3</sub>                   | Roth p.a.                  |
| HF                                 | Roth suprapur              |
| NH <sub>4</sub> NO <sub>3</sub>    | Merck z.A                  |
| CH <sub>3</sub> COONH <sub>4</sub> | Merck z.A.                 |
| NH <sub>2</sub> OH-HCl             | Merck z.S.                 |
| EDTA                               | Roth z.A.                  |
| NH <sub>4</sub> -Oxalate           | Merck p.a.                 |
| Ascorbic acid                      | Merck p.a.                 |
| Ammonia                            | Roth, Ph.Eur               |
| Ethanol                            | Roth, denatured            |

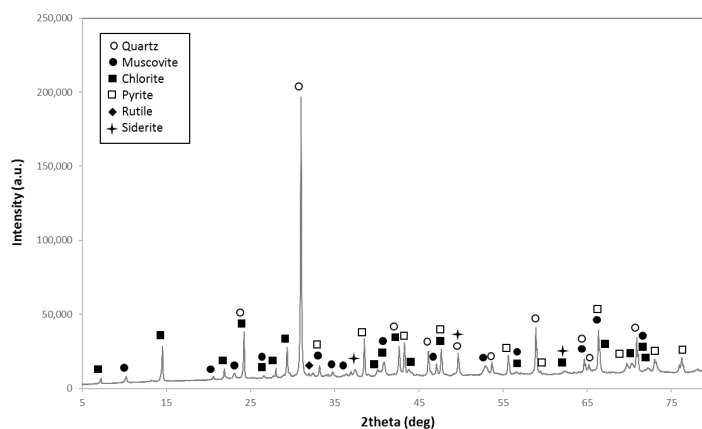

**Figure S1.** XRD scan of the Neves Corvo waste rock (NC\_01)

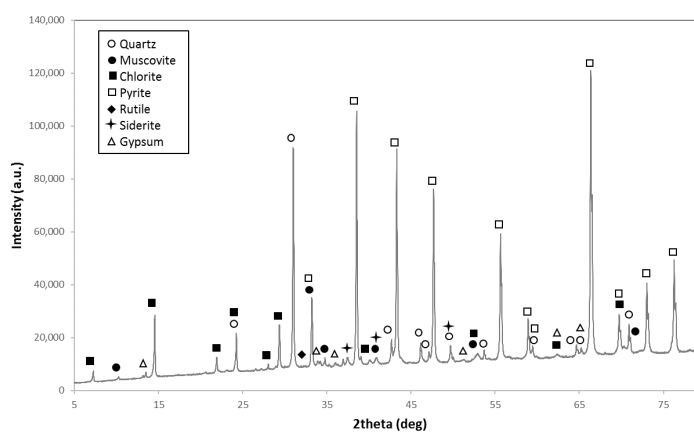

**Figure S2.** XRD scan of the Neves Corvo tailing (NC\_02)
